# Supplementary material for: Synthesis and drug release profile of a dual-responsive poly(ethylene glycol) hydrogel nanocomposite
Source: Royal Society of Chemistry journal article supplement (doi:10.1039/c7ra02846f), 2017-01-01
Supplement: c7ra02846f1.pdf [file c7ra02846f1.pdf]

## Synthesis and drug release profile of a dual-responsive poly(ethylene glycol) hydrogel nanocomposite

Ernandes Taveira Tenório-Neto<sup>a,b,\*</sup>, Diego de Souza Lima<sup>a</sup>, Marcos Rogério

Guilherme<sup>a</sup>, Michele Karoline Lima-Tenório<sup>a,b</sup>, Débora Botura Scariot<sup>c</sup>, Celso Vataru

Nakamura<sup>c</sup>, Marcos Hiroiuiqui Kunita<sup>a†</sup>, and Adley Forti Rubira<sup>a\*</sup>,

*a Department of Chemistry, State University of Maringá, Av. Colombo, 5790, CEP 87020-900, Maringá, Paraná, Brazil.*

*b Department of Chemistry, State University of Ponta Grossa, Av. Gen. Carlos Cavalcanti, 4748, CEP 84030-900, Ponta Grossa, Paraná, Brazil.*

*c Department of Basic Sciences of Health, State University of Maringá, Av. Colombo, 5790, CEP 87020-900, Maringá, Paraná, Brazil.*

*† In memoriam*

\* Corresponding Authors:

*tenorioernandes@gmail.com (E.T. Tenório-Neto) Tel.: +55 42 3220-3062*

*afrubira@uem.br (A.F. Rubira) Tel.: +55 44 3011 3686*

### Supplementary Information

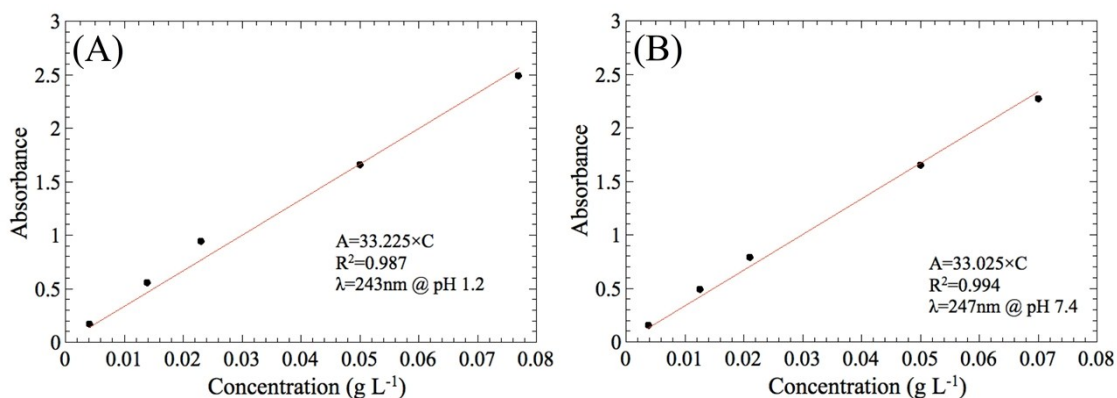

Figure S1. Calibration curve of prednisolone in different buffer solutions: (A) pH 1.2, and (B) pH 7.4.

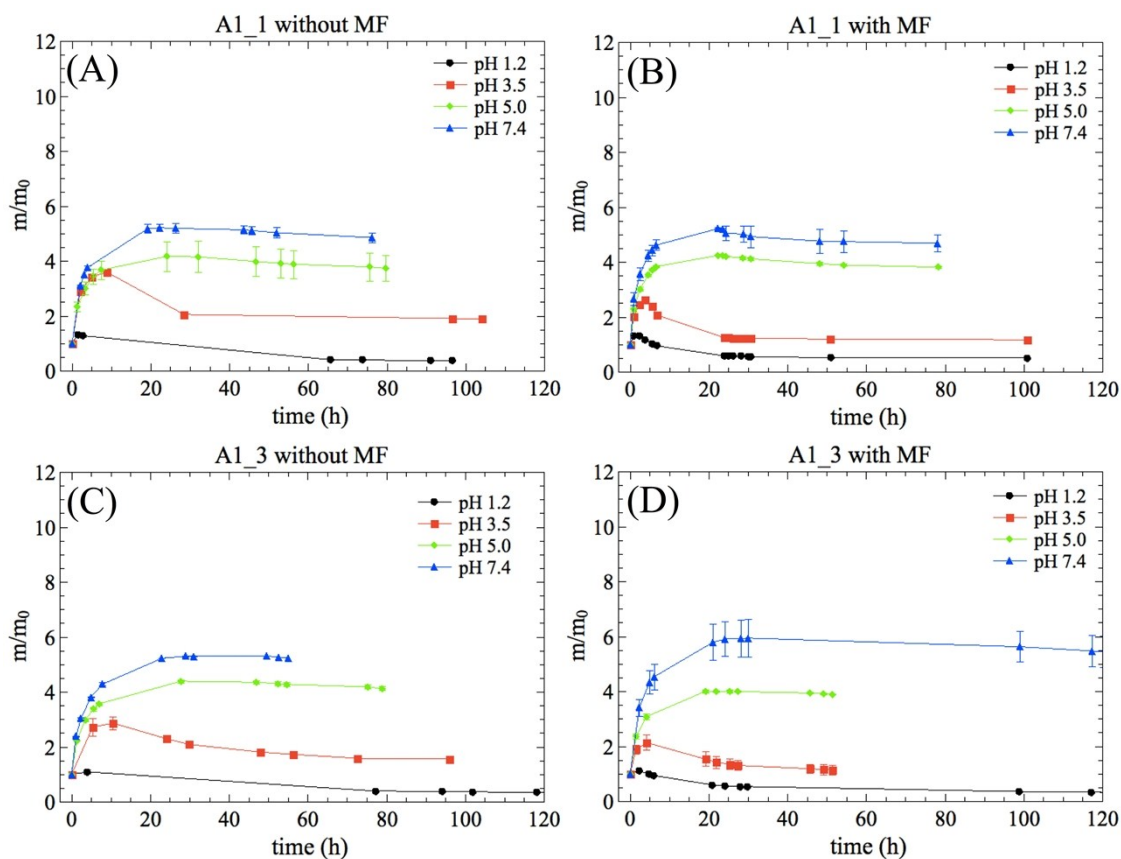

Figure S2. Time-dependent swelling curves at the indicated pH at temperature of 36.5°C: (A) A1\_1 without MF, (B) A1\_1 with MF, (C) A1\_3 without MF, (D) A1\_3 with MF. Note: Observe that the swelling behavior was not affected by the MF.

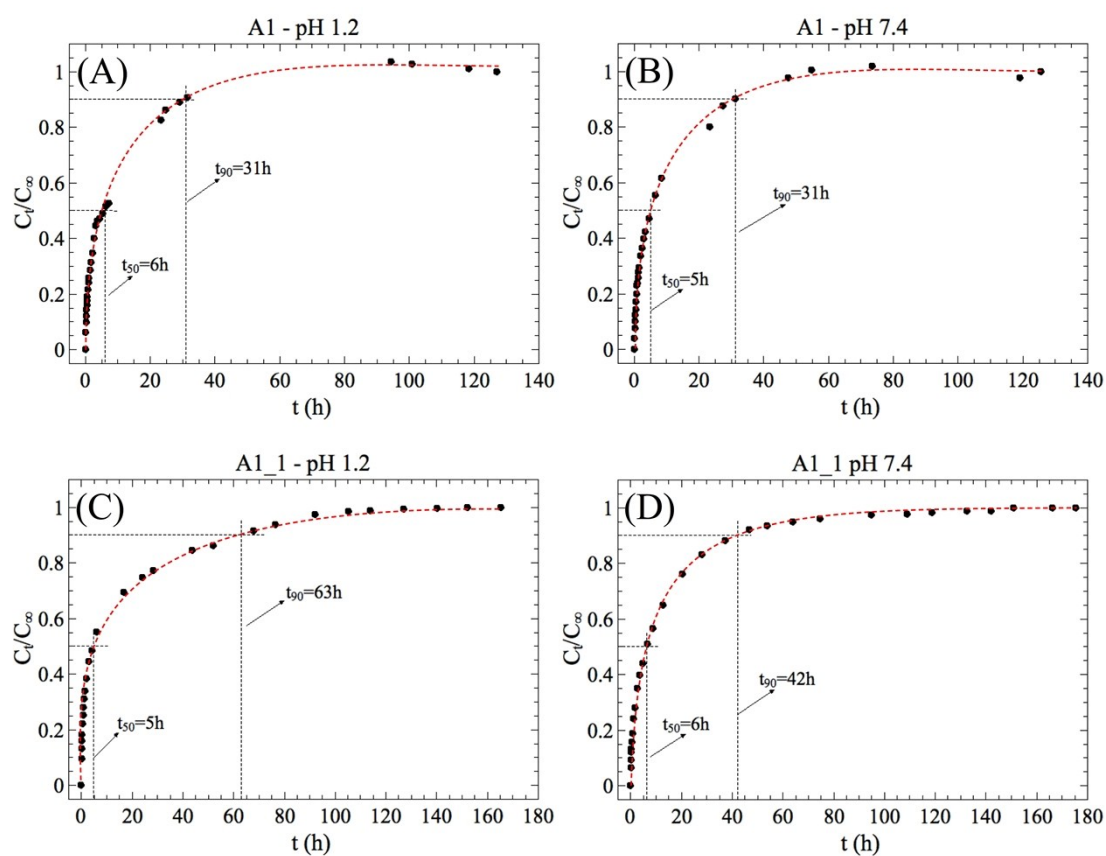

Figure S3. Time-dependent release curves of prednisolone from A1, and A1\_1 hydrogels nanocomposites in different pH at a temperature of 37 °C. For sample A1\_1, the experiments were carried out using an applied magnetic field of 48MGOe.

Table S1. Fitting parameters ( $n$  and  $k$ ) of Eq. (1) to experimental release data of prednisolone from the hydrogels A1 and A1\_1 at pH 1.2 and 7.4 with an applied magnetic field.

| Sample name |        | $n$             | $k$ (h <sup>-1/2</sup> ) |
|-------------|--------|-----------------|--------------------------|
| A1          | pH 1.2 | $0.52 \pm 0.01$ | $0.244 \pm 0.002$        |
|             | pH 7.4 | $0.58 \pm 0.02$ | $0.221 \pm 0.004$        |
| A1_1        | pH 1.2 | $0.42 \pm 0.01$ | $0.286 \pm 0.003$        |
|             | pH 7.4 | $0.46 \pm 0.01$ | $0.219 \pm 0.002$        |
